# Supplementary material for: Neutral genetic drift can alter promiscuous protein functions, potentially aiding functional evolution
Source: Springer Nature journal article supplement (doi:10.1186/1745-6150-2-17), 2007-06-28
Supplement: Additional file 2 [file 1745-6150-2-17-s2.pdf]

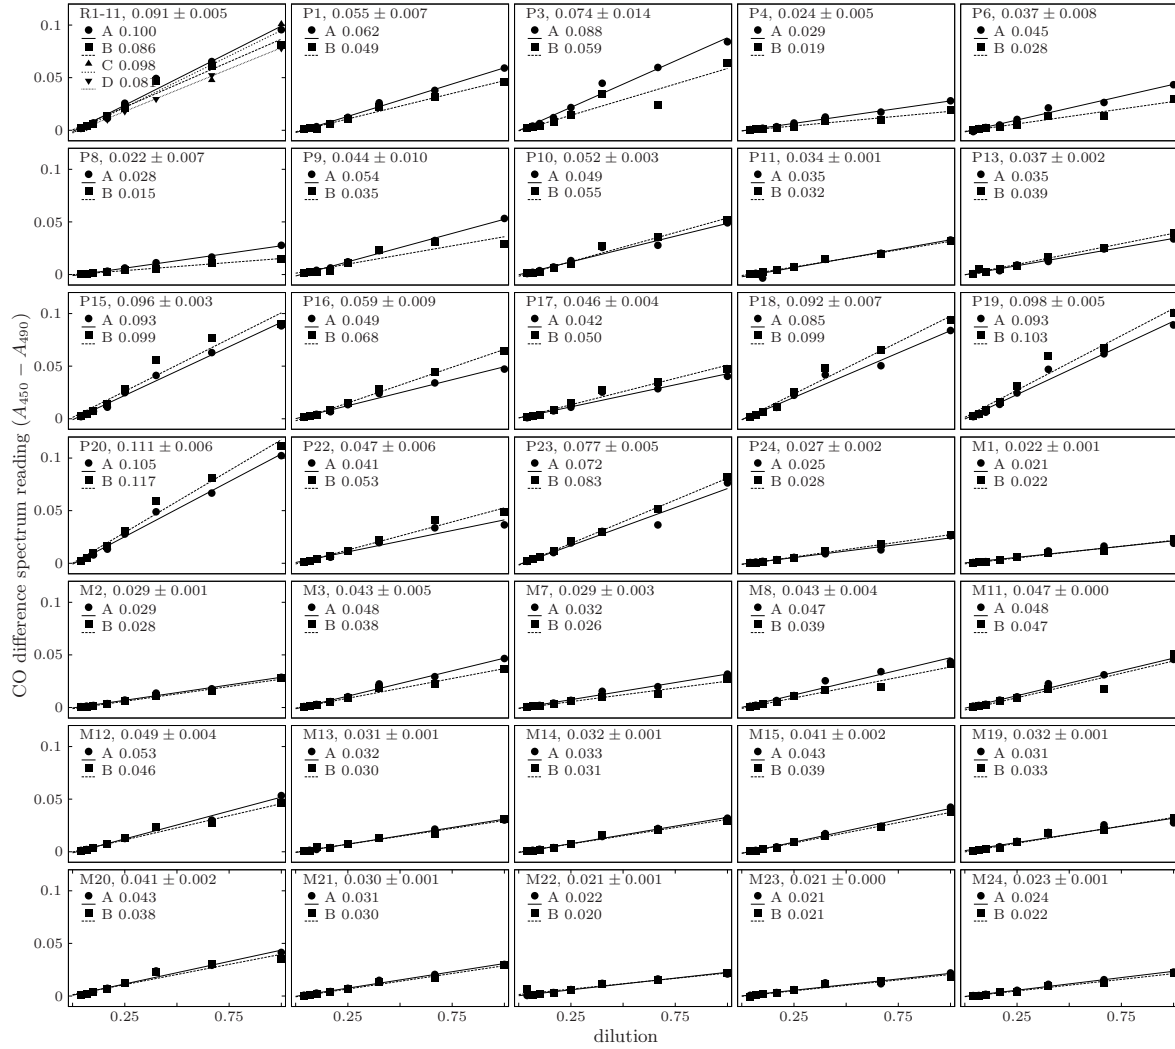

The standard curves used to determine the protein concentrations by CO difference spectrum measurements.

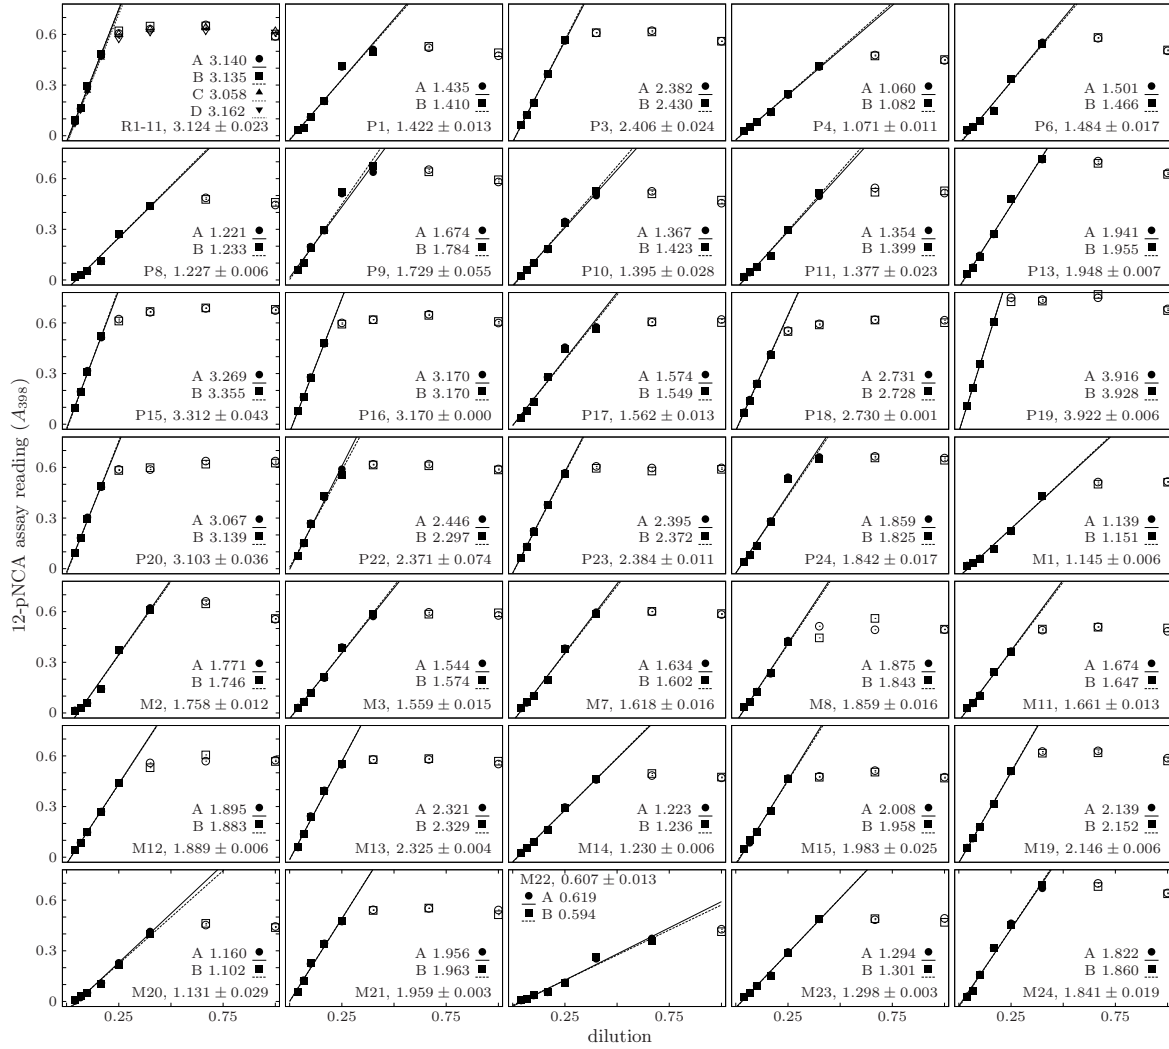

The standard curves used to determine the activities on 12-pNCA.

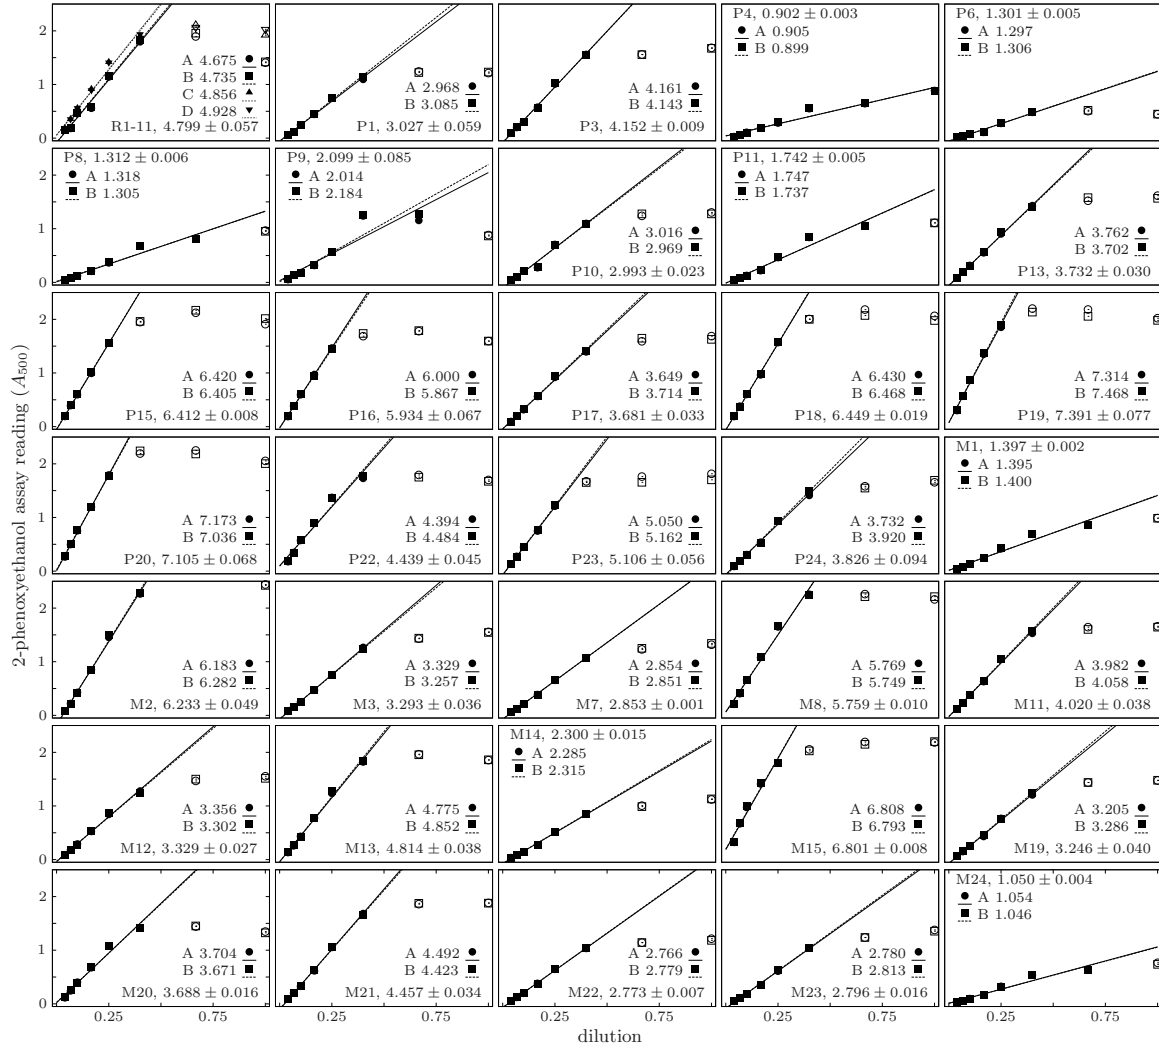

The standard curves used to determine the activities on 2-phenoxyethanol using the 4-AAP assay.

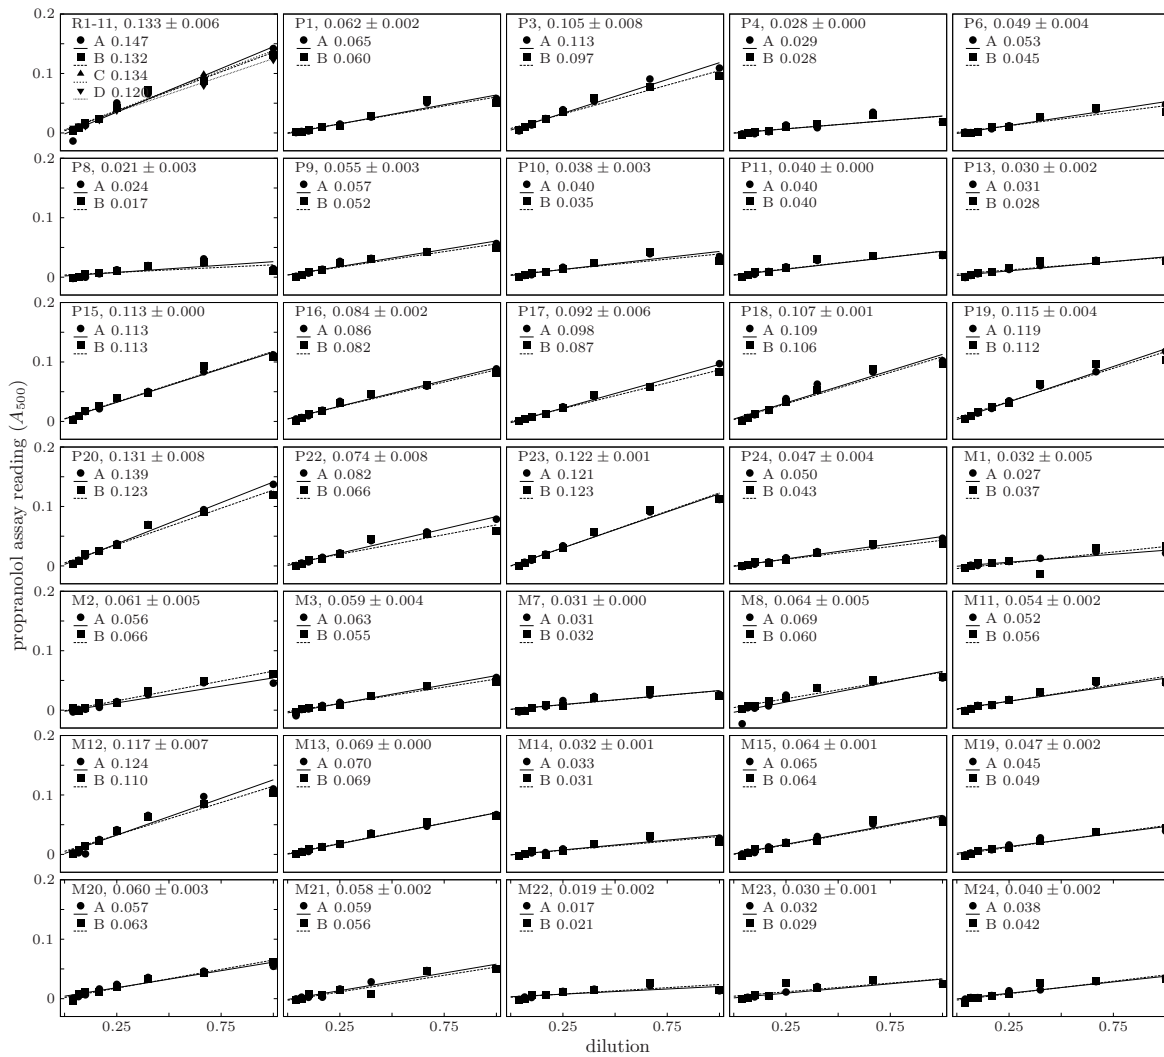

The standard curves used to determine the activities on propranolol using the 4-AAP assay.

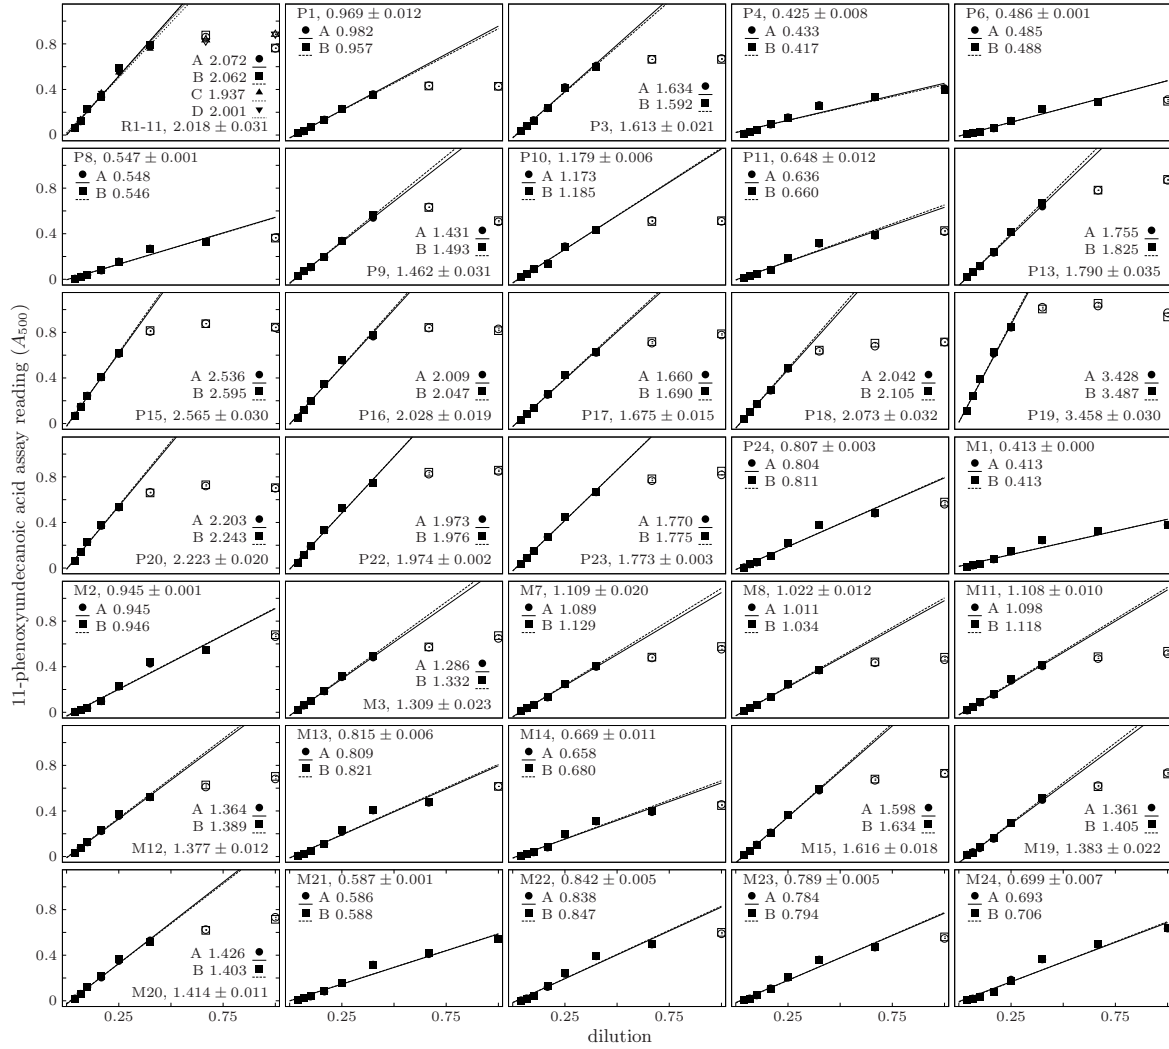

The standard curves used to determine the activities on 11-phenoxyundecanoic acid using the 4-AAP assay.

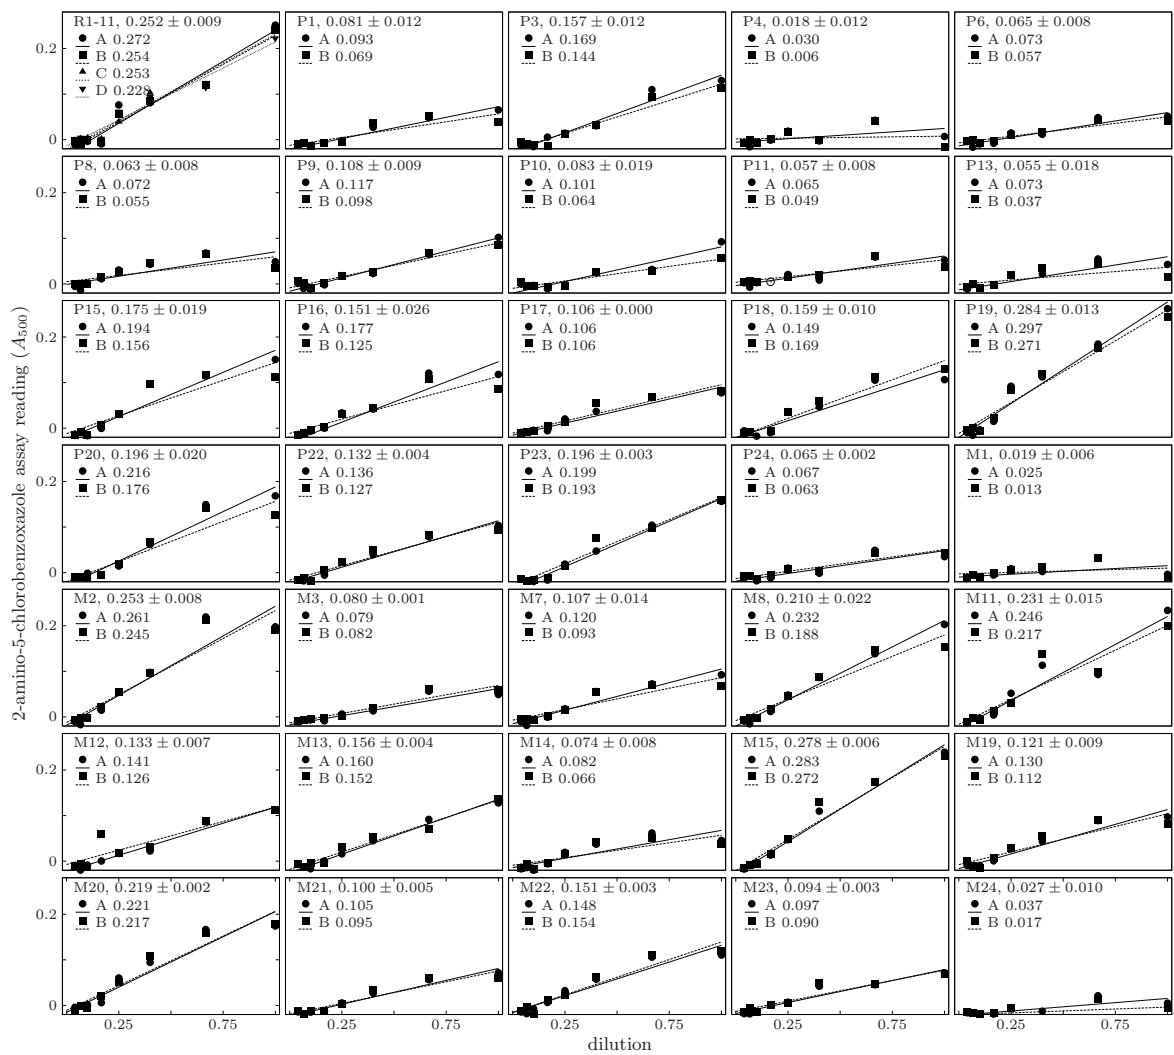

The standard curves used to determine the activities on 2-amino-5-chlorobenzoxazole using the 4-AAP assay.

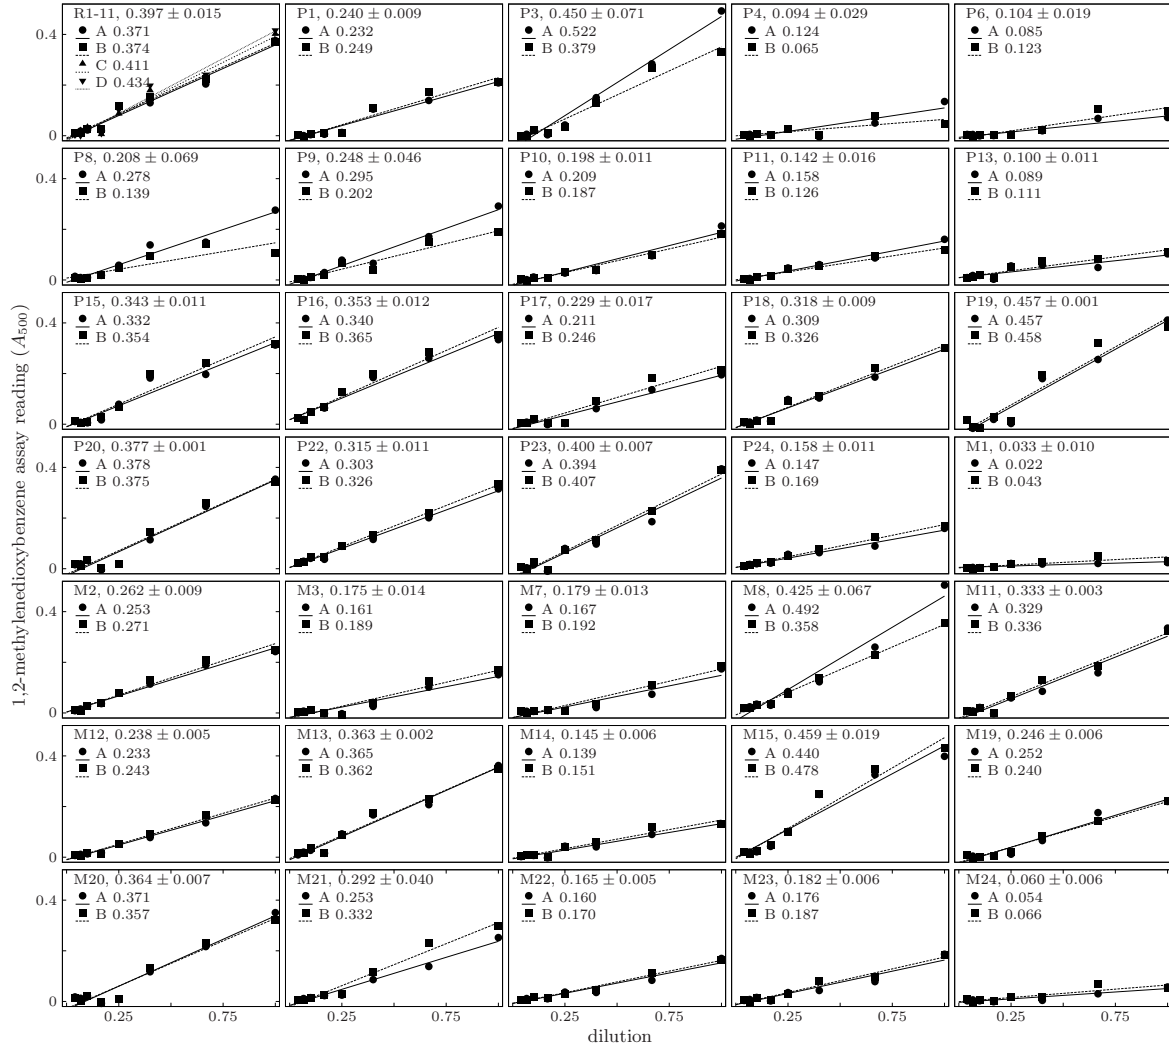

The standard curves used to determine the activities on 1,2-methylenedioxybenzene using the 4-AAP assay.
